26 using five home range estimators and non-parametric resource selection functions.  
27 From all home range estimators, the median 95 % home range size was between  
28 39-68 km<sup>2</sup> (range: 22-161 km<sup>2</sup>), with the 50 % core range size between 6-13 km<sup>2</sup>  
29 (range: 5-33 km<sup>2</sup>). The space-time autocorrelated kernel density estimate (AKDE)  
30 had the largest median 95 % home range size = 68 km<sup>2</sup> and a 50 % core range = 13  
31 km<sup>2</sup>. Local convex hulls (LoCoH) estimated the smallest median 95 % home range =  
32 39 km<sup>2</sup> and a 50 % core range = 6 km<sup>2</sup>. From the resource selection functions, all  
33 adults used areas high in photosynthetic leaf and canopy structure but avoided areas  
34 of old growth biomass and denser areas of vegetation, possibly due to foraging  
35 forays into fragmented areas away from nesting sites. For the first time, we  
36 determine two important spatial processes for this Critically Endangered raptor that  
37 can help in directing conservation management. Rather than employing a single  
38 home range estimator, we recommend that analysts consider multiple approaches to  
39 animal movement data to fully explore space-time and resource use.

40

## 41 **Introduction**

42 Estimating animal home range size and habitat resource selection is a fundamental  
43 aspect in wildlife ecology and conservation (Hooten *et al.* 2017). Quantifying home  
44 range behaviour and resource selection using Global Positioning System (GPS)  
45 telemetry devices are used to inform conservation management and policy (Fieberg  
46 *et al.* 2021; Silva *et al.* 2021). Therefore, it is crucial that reliable and robust metrics  
47 are used for both. Since the inception of the home range concept (Burt 1943), many  
48 home range estimators have been used (Signer & Fieberg 2021). However, finding a  
49 reliable home range estimator has proven difficult due to the analytical challenges  
50 inherent with animal movement data that are often autocorrelated, have irregular

51 sampling, or small sample sizes (Silva *et al.* 2021). Similarly, estimating resource  
52 selection functions by comparing environmental covariates at an individual's used  
53 locations to those environmental locations assumed to be available with logistic  
54 regression is popular (Johnson *et al.* 2006). However, interpreting resource selection  
55 model parameters to inform management is difficult (Fieberg *et al.* 2021).

56

57 An animal's home range is formally defined as those movements regularly used for  
58 foraging and breeding but excluding occasional sallies outside of this area (Burt  
59 1943; Fieberg & Borger 2012). Thus, an animal's home range reflects its ecological  
60 needs and the decisions that result from these environmental requirements  
61 (Tétreault & Franke 2017). Home ranges are therefore expected to differ amongst  
62 individuals within a species over space and time dependent on shifting ecological  
63 needs and varying resources (Signer & Fieberg 2021). Further, selection of a  
64 specific home range estimator can in itself explain as much of the variation in home  
65 range size as the ecological processes influencing it (Signer *et al.* 2015; Tétreault &  
66 Franke 2017).

67

68 Home range estimators can be split into two classes: geometric and probabilistic  
69 (Signer & Fieberg 2021). Geometric estimators are built following a set of hull-based  
70 rules, with a typical example being a minimum convex polygon (MCP). However, the  
71 MCP often overestimates the home range, with Local Convex Hulls (LoCOH, Getz &  
72 Wilmers 2004), which generalize the MCP, an improved estimator able to account for  
73 autocorrelation, better reflecting the true home range by considering hard boundaries  
74 within the range extent (Getz *et al.* 2007). Further, Time Local Convex Hulls (T-  
75 LoCoH) are a further generalization of local convex hulls, incorporating time by using

76 adaptive scaling of individual velocities to define a utilization distribution that  
77 captures space-time use (Lyons *et al.* 2013). Conversely, probabilistic estimators are  
78 constructed using an underlying probabilistic model which estimates a utilization  
79 distribution, that is, the relative frequency distribution of an animal's locations in two-  
80 dimensional space (Van Winkle 1975). The utilization distribution is an extension of  
81 the original home range concept (Burt 1943), where an animal's use of space is  
82 defined by a probability density function that quantifies the chance the animal will be  
83 found at any given location within its home range (Van Winkle 1975; Worton 1987).  
84  
85 Kernel density estimators (KDEs, Worton 1989) are a non-parametric probabilistic  
86 estimator, fitted with both fixed and adaptive kernel bandwidths to account for over  
87 smoothing (Wand & Jones 1994). However, fixed and adaptive KDEs can  
88 overestimate home range sizes, even when accounting for bandwidth over  
89 smoothing with an adaptive kernel (Silva *et al.* 2021). Recently, autocorrelated kernel  
90 density estimates (AKDE, Fleming & Calabrese 2017) have been proposed as an  
91 improvement on fixed and adaptive KDEs. AKDEs first fit an Ornstein-Uhlenbeck  
92 (Uhlenbeck & Ornstein 1930) continuous-time stochastic process movement model  
93 to the animal locations, and then incorporate the movement model into an area-  
94 corrected home range estimator with weighting that accounts for autocorrelation and  
95 irregular sampling (Calabrese *et al.* 2016; Silva *et al.* 2021). Space-time home range  
96 estimates are therefore expected to provide more robust estimates of the utilization  
97 distribution because they account for the important third dimension of time in animal  
98 movement patterns (Keating & Cherry 2009).

99

100

101 Within an animal's home range, resource selection functions (RSFs) are used to  
102 infer the probability of resource use for a given individual within that defined area  
103 (Manly *et al.* 2002). Standard parametric logistic regression is the most popular  
104 method to quantify resource selection (Johnson *et al.* 2006) but has been criticized  
105 because used locations (species presence) are continuous points but are compared  
106 to available locations (raster pixels) in discrete space (Keating & Cherry 2004;  
107 Fieberg *et al.* 2021). Poisson point processes have been proposed as an alternative  
108 to standard parametric resource selection functions to make habitat selection  
109 analyses easier to understand and more accessible to a wide range of end users  
110 (Baddeley *et al.* 2012). For ease of interpretation, non-parametric RSFs can be fitted  
111 directly to the species locations without accounting for available locations using a  
112 point process intensity probability density function based on a kernel density  
113 estimate (Baddeley *et al.* 2012).

114

115 The Philippine Eagle (*Pithecophaga jefferyi*) is a globally threatened tropical forest  
116 raptor (Bildstein *et al.* 1998), currently classified as 'Critically Endangered' on the  
117 IUCN Red List (BirdLife International 2018). This large eagle is endemic to four  
118 islands in the Philippine archipelago (Mindanao, Leyte, Samar, and Luzon; Kennedy  
119 1977), with a restricted distribution across lowland and montane tropical forests  
120 (Salvador & Ibañez 2006; Sutton *et al.* 2022). The two key threats to its future  
121 survival are habitat loss and human persecution (Salvador & Ibañez 2006). Despite  
122 its elevated extinction risk, fundamental aspects of Philippine Eagle ecology such as  
123 home range size and habitat use are relatively unknown. Indeed, the IUCN Red List  
124 suggests that further research into ecological requirements is urgently required to  
125 inform conservation actions (BirdLife International 2018). Here, we use satellite

126 telemetry locations from six GPS tagged adult Philippine Eagles to (1), estimate  
127 home range size using five geometric and probabilistic estimators, and (2), quantify  
128 habitat use with non-parametric resource selection functions. Finally, we outline how  
129 quantifying these key ecological processes can inform conservation action for this  
130 raptor of conservation concern.

131

## 132 **Methods**

### 133 **GPS telemetry data**

134 We sourced Philippine Eagle satellite telemetry locations from the Philippine Eagle  
135 Foundation that is archived in the Global Raptor Impact Network (GRIN, McClure *et*  
136 *al.* 2021), a data information system for global population monitoring for all raptors.  
137 For the Philippine Eagle, GRIN includes GPS fixes from six breeding adult Philippine  
138 Eagles (four females, two males) on the island of Mindanao. All Philippine Eagles  
139 were trapped using either a modified Bal-Chatri (Miranda & Ibanez 2006) or a large  
140 bownet baited with domestic rabbit (*Oryctolagus cuniculus*). Two eagles were  
141 instrumented with solar-powered Global Positioning System-Global System for  
142 Mobile Communications (GPS-GSM) transmitters (weight = 70 g; Microwave  
143 Telemetry, Inc) while four eagles had battery-powered LC4™ Argos-GPS platform  
144 transmitter terminal (PTT) fitted (weight = 105g; Microwave Telemetry, Inc),  
145 harnessed with Teflon-coated nylon ribbon backpacks. All tags weighed < 3 % of the  
146 body weight for all adults tagged. Tags were programmed to transmit on a 2-hr  
147 sampling interval for adults 001F, 002F, 004M, 006F, with adult 003F at 24 hrs and  
148 adult 005M at 2 mins. All birds were marked with aluminium leg bands – the four  
149 females with blue bands on their left tarsus, and the two males with green bands on  
150 their right tarsus. All GPS transmitter harnessing was conducted with a Gratuitous

151 Permit to trap and tag the birds in the presence of a veterinarian as required by the  
152 national government of the Philippines.

153

154 A total of 80,481 fixes were obtained from four adult females and two adult males  
155 from April 2013 to September 2021 (Table 1). We removed all duplicated records  
156 and used all raw GPS fixes in the autocorrelated kernel density estimates (AKDEs)  
157 for all birds except 005M which we sub-sampled using a 3-hr interval due to  
158 computing constraints using the full raw dataset of 74,098 fixes. For the fixed and  
159 adaptive kernel density estimates (KDEs) along with local convex hull (LoCoH)  
160 estimators, we subsampled fixes from all birds using a minimum 3-hour interval  
161 between fixes to achieve consistency across estimators and to account for  
162 autocorrelation (Signer & Fieberg 2021). We assessed how effective the number of  
163 GPS relocations was at capturing the utilization distribution using an incremental  
164 analysis with bootstrapped minimum convex polygons ( $n = 100$ ), quantifying when  
165 the number of relocations within the MCP area reached an asymptote (Walls &  
166 Kenward 2012), using the 'hrBootstrap' function in the R package move  
167 (Kranstauber *et al.* 2020). From our bootstrapped estimates, the number of  
168 relocations for all six adults was sufficient at capturing the MCP utilization  
169 distribution, ranging from asymptotes of 100 relocations for adult 003F to 1000  
170 relocations for adult 005M (Fig. S1).

171

172

173

174

175

176

177 **Table 1.** Global Positioning System (GPS) telemetry metadata for six satellite tagged adult Philippine  
178 Eagles from the island of Mindanao, used for home range estimation. Totals for 3-hr fixes are  
179 subsampled from the raw data locations using a 3-hr sampling rate interval. Totals for 250m fixes are  
180 the number of spatially thinned fixes using a 250m spatial filter.

181

| ID    | Sex    | From       | To         | Raw fixes | 3-hr fixes | 250m fixes |
|-------|--------|------------|------------|-----------|------------|------------|
| 001F  | Female | 16/02/2014 | 10/05/2015 | 1487      | 1186       | 290        |
| 002F  | Female | 22/12/2014 | 20/01/2016 | 1370      | 1063       | 311        |
| 003F  | Female | 11/04/2013 | 19/02/2014 | 263       | 263        | 138        |
| 004M  | Male   | 19/04/2014 | 05/08/2014 | 240       | 190        | 144        |
| 005M  | Male   | 17/11/2019 | 12/09/2021 | 74098     | 5252       | 822        |
| 006F  | Female | 15/10/2019 | 05/06/2021 | 3023      | 2344       | 444        |
| Total |        |            |            | 80481     | 10298      | 2149       |

182

183 To test for range residency we calculated semi-variance functions visualised with  
184 empirical variograms to identify unbiased estimates of stationary movement periods  
185 of site fidelity with data containing time-averaged autocorrelation structure in the R  
186 package *ctmm* (Calabrese *et al.* 2016). Variograms represent the average square  
187 distance travelled within a specified time lag. We used a median sampling interval for  
188 the time lag bin widths and Markovian Confidence Intervals for calculating the  
189 maximum number of non-overlapping lags (Calabrese *et al.* 2016). All six adults  
190 showed site fidelity with clear asymptotes ranging between 2 to 18 km continuous  
191 range residency behaviour after 3 to 9 day short time lags and all less than one  
192 calendar month from tagging (except adult 006F which was less than 2 calendar  
193 months), supporting the application of home range analysis (Figs. S2-S3).

194

### 195 **Home range estimation**

196 Utilization distributions were constructed to estimate the probability of relocating an  
197 individual within a given home range using the standard definitions in two-



198 dimensional space (Van Winkle 1975; Worton 1987, 1989), which we further extend  
199 to three-dimensional space-time (Keating & Cherry 2009). We calculated utilization  
200 distributions using five home range estimators because of variation in outputs  
201 between different estimator methods (Signer & Fieberg 2021). For all estimators we  
202 fitted 95 % probability of use contour isopleths to represent the home range  
203 utilization distribution (Laver & Kelly 2008), and 50 % probability of use contour  
204 isopleths to represent a core range utilization distribution, characteristic of a territorial  
205 area (White & Garrott 1990). We selected a core range of 50 % probability of use to  
206 maintain consistency across the different estimators but recognise that defining a 50  
207 % core range is not always appropriate (Vander Wal & Rodgers 2012). All home  
208 range area estimates were calculated in a Universal Time Mercator (UTM) projection  
209 in R (v3.5.1; R Core Team 2018) and following analytical recommendations from  
210 Laver & Kelly (2008).

211

### 212 ***Kernel Density Estimates***

213 We calculated utilization distributions using three different kernel density estimators  
214 (Worton 1989). First, we fitted standard fixed bandwidth non-normal Epanechnikov  
215 kernels (Epanechnikov 1969), with an ad-hoc reference smoothing parameter ( $h_{ref}$ )  
216 multiplied by 1.77 (Silverman 1986), based on the number of locations and the  
217 variance between x and y coordinates. Second, we fitted adaptive smoothing plug-in  
218 bandwidth bivariate kernel estimates ( $h_{pi}$ ) (Wand & Jones 1994) using a Sum of the  
219 Asymptotic Mean Squared Error (SAMSE) pilot bandwidth selector (Duong &  
220 Hazelton 2003). We assessed a range of potential univariate plug-in bandwidth  
221 selectors (termed 'pilots') and opted for SAMSE due to its higher numerical stability  
222 (Duong 2007) and the low variance between each respective pilot bandwidth. We

223 fitted both fixed and adaptive KDEs in the R packages *adehabitatHR* (Calenge  
224 2006), *ks* (Duong 2007) and *sp* (Bivand *et al.* 2013), with R code adapted from  
225 Tétreault & Franke (2017).

226

227 We fitted autocorrelated KDEs (AKDEs; Fleming & Calabrese 2017) in the R  
228 package *ctmm* (Calabrese *et al.* 2016) with a movement model that best explains the  
229 autocorrelated structure of our tracking data using a perturbative Hybrid Residual  
230 Maximum Likelihood parameter estimator (pHREML), which is a form of maximum  
231 likelihood estimation that reduces bias in variance/covariance estimation (Silva *et al.*  
232 2021). AKDEs were fitted with a continuous-time stochastic process movement  
233 model to overcome the autocorrelated nature of our GPS tracking fixes and mitigate  
234 small absolute and effective sample sizes (Calabrese *et al.* 2016). We evaluated a  
235 pool of candidate movement models for each individual eagle from Ornstein-  
236 Uhlenbeck movement patterns including both isotropic (symmetrical diffusion) and  
237 anisotropic (asymmetrical diffusion) variants, along with the standard KDE  
238 assumption of independent and identical distributed (IID) data, based on Akaike's  
239 Information Criterion (Akaike 1974) adjusted for small sample sizes (AIC<sub>c</sub>; Hurvich &  
240 Tsai 1989). We considered all models with a  $\Delta\text{AIC}_c < 2$  as having strong support  
241 (Burnham & Anderson 2004). From our candidate models, the best supported  
242 movement process for all six eagles was an Ornstein-Uhlenbeck anisotropic process  
243 ( $\Delta\text{AIC}_c = 0.0$ ; Table S1), which we then fitted into an area-corrected AKDE home  
244 range estimator with additional weighting that upweights fixes in under-sampled  
245 times and down-weights fixes in over-sampled times (Silva *et al.* 2021).

246

247

## 248 **Local Convex Hulls**

249 We calculated utilization distributions using fixed and temporal Local Convex Hull  
250 (LoCoH) estimators, both using  $k$  nearest neighbour convex hulls, which are a  
251 generalization of a minimum convex polygon estimator (Getz & Wilmers 2004), in the  
252 R package *tloch* (Lyons *et al.* 2013). We constructed fixed local convex hulls by  
253 associating each point and its  $k-1$  nearest neighbours localized in space. The hulls  
254 were then ordered smallest to largest, taking the cumulative union of each hull from  
255 smallest upwards thus constructing the utilization distribution isopleths, with the  
256 smallest hulls indicating the most frequently areas, i.e., the 10% isopleth contains  
257 10% of the points with a higher utilization than the 95% isopleth that contains 95% of  
258 the points (Getz *et al.* 2007; T treault & Franke 2017). In addition, we constructed  
259 time local convex hulls (T-LoCoH), which are a generalization of LoCoH,  
260 incorporating time into the aggregation of the  $k$ -nearest neighbour local convex hulls  
261 in Euclidean space using adaptive scaling of individual velocities to define a  
262 utilization distribution that captures space-time use (Lyons *et al.* 2013). T-LoCoH  
263 incorporates the timestamp as a time-scaled distance metric between any two points  
264 into a third axis of Euclidean space in the selection of  $k$ -nearest neighbours and hull  
265 sorting within the LoCoH algorithm.

266

## 267 **Resource Selection**

### 268 **Habitat covariates**

269 We quantified resource selection using the GPS fixes and three habitat covariates  
270 derived from satellite remote sensing data using 16-day 250-m composite surface  
271 reflectance band imagery from the Moderate Resolution Imaging Spectroradiometer  
272 (MODIS, <https://modis.gsfc.nasa.gov/>) product MCD13Q1. We used two surface

273 reflectance bands that represent unclassified raw measures of vegetation structure  
274 and composition, used previously to represent vegetation patterns (Morán-Ordóñez  
275 *et al.* 2012; Shirley *et al.* 2013; Van doninck *et al.* 2020). Band 2 Near Infrared  
276 represents leaf and canopy structure, with Band 7 Short Wave Infrared related to  
277 senescent or old growth biomass (Shirley *et al.* 2013). Additionally, we used  
278 Enhanced Vegetation Index (EVI) processed using all four MODIS surface  
279 reflectance bands using the 'spectralIndices' function in the R package RStoolbox  
280 (Leutner *et al.* 2019). EVI ranges on a scale from -1 to 1, with positive values closer  
281 to 1 indicating dense, healthy vegetation, and negative values indicating low  
282 vegetation cover.

283

284 EVI is an optimized vegetation index responsive to canopy structure variations and  
285 with improved sensitivity in areas of high biomass through reduction in background  
286 noise and atmospheric influences (Huete *et al.* 2002). We selected EVI due to its  
287 superior performance at capturing dense vegetation characteristics and canopy  
288 structure in tropical regions compared to other spectral indices such as Normalised  
289 Difference Vegetation Index (NDVI; Qiu *et al.* 2018), which tends to saturate in  
290 densely vegetated areas (Huete *et al.* 2002). We downloaded imagery  
291 corresponding to the start and end dates over the time period of each tracked eagle  
292 using the R package MODISstsp (Busetto & Ranghetti 2016) and calculated mean  
293 surface reflectance values over each respective time period to use in processing the  
294 covariates. All surface reflectance bands contain spectral reflectance values  
295 estimated by target at surface, calibrated with cloud detection and atmospheric  
296 corrections. Reflectance values are expressed as the ratio of reflected over incoming  
297 radiation, meaning reflectance can be measured between the values of zero and

298 one. Absolute reflectance values of 3-4 indicate healthy vegetation (Huete *et al.*  
299 2004). All covariates used for each respective eagle had low collinearity with  
300 Variance Inflation Factors <2.

301

### 302 **Resource Selection Functions**

303 We thinned GPS fixes using a 250-m spatial filter (Table 1) to match the resolution of  
304 the covariate rasters and fitted presence points and the three covariates to individual  
305 RSFs following third-order home range resource selection (Johnson 1980). We  
306 defined a resource use home range for each individual eagle by merging the 95 %  
307 maximum likelihood AKDE with a 100 % minimum convex polygon to fully capture  
308 the total potential home range and thus all the spatially filtered GPS fixes therein  
309 (Northrup *et al.* 2013). We fitted non-parametric RSFs where we only considered  
310 resource use at presences using a point process intensity probability density function  
311 using the 'rhat' function in the R package spatstat (Baddeley & Turner 2005).  
312 RSFs were fitted by computing a non-parametric kernel smoothing estimate of  
313 locations as a point process intensity function  $\lambda(u)$  of the three spatial covariates  
314 over each respective eagles' home range window following the formulation of  
315 Baddeley *et al.* (2012),

$$316 \lambda(u) = \rho(Z(u))$$

317

318 where  $Z$  is the spatial covariate and  $\rho(z)$  is the resource selection function to be  
319 estimated, with  $u$  representing location. We fitted Gaussian kernel densities with  
320 variable-bandwidth kernel smoothing using cross-validated bandwidth selection  
321 which assumes a Cox process for clustered data (Diggle 1985) and an isotropic  
322 edge correction for polygon windows derived from Ripley's K-function (Ripley 1988).

323 Additionally, we corrected for sampling bias with Horvitz-Thompson weighting  
324 (Horvitz & Thompson 1952), where each GPS fix in the sample is weighted by the  
325 reciprocal of its sampling probability. We fitted all RSFs with 95 % Confidence  
326 Intervals.

327

## 328 **Results**

### 329 **Home Range Estimation**

#### 330 ***Kernel Density Estimates***

331 The median 95 % home range estimate from the fixed Epanechnikov KDE was 61  
332 km<sup>2</sup> (SE ±13.5), and the median 50 % core home range estimate 12 km<sup>2</sup> (SE ±1.9),  
333 with the core range comprising 21 % of the 95% home range area (Table 2; Fig. S4).  
334 Home range estimates from the adaptive SAMSE KDE were smaller, with the  
335 median 95 % home range estimate 43 km<sup>2</sup> (SE ±5.7) and a median 50 % core home  
336 range estimate of 7 km<sup>2</sup> (SE ±1.2), with the core range comprising 19 % of the 95%  
337 home range area (Table 2; Fig. S4). The median 95 % home range estimate from  
338 the weighted AKDEs was greater than both the fixed and adaptive estimates at 68  
339 km<sup>2</sup> (CI = 62-74 km<sup>2</sup>), with the median 50 % core home range estimate 13 km<sup>2</sup> (CI =  
340 11-14 km<sup>2</sup>), comprising 21 % of the 95% home range area (Table 3, Fig. 1).

341

#### 342 ***Local Convex Hulls***

343 The median 95 % home range estimate from the LoCoH estimators was 39 km<sup>2</sup> (SE  
344 ±7.8), and the median 50 % core home range estimate 6 km<sup>2</sup> (SE ±0.8), comprising  
345 20 % within the 95% home range area (Table 4; Fig. S5). Home range estimates  
346 from the T-LoCoH were larger, with the median 95 % home range estimate 56 km<sup>2</sup>  
347 (SE ±12.0) and the median 50 % core home range estimate 13 km<sup>2</sup> (SE ±1.2),

348 comprising 25 % of the 95% home range area (Table 4; Fig. 2). Overall, using the  
349 median estimates there was a 19-21 % probability of space use within the 50 % core  
350 range across all estimators, except for the temporal LoCoH where 50 % probability  
351 of use increased to 25 % core range use (Table 4). AKDE estimated the largest  
352 range of 95 % utilization distributions (39-161 km<sup>2</sup>), with the adaptive KDE estimating  
353 the smallest range of 95 % utilization distributions (26-58 km<sup>2</sup>, Fig. 3). Adult female  
354 003F and adult male 005M had the narrowest range of home range size estimates  
355 (Fig. 3), with adult female 006F having the broadest range of home range size  
356 estimates overall (Figs. 3 & 4).

357

### 358 **Resource selection**

359 From the non-parametric RSF response functions, all six eagles were associated  
360 with Band 2 Near Infrared values peaking between 0.34-0.39 (Fig. 5), indicating a  
361 relationship with dense, healthy leaf and canopy structure. Band 7 Shortwave  
362 Infrared values peaked between 0.07-0.14, indicating an association with areas of  
363 lower percent old growth biomass for all adults (Fig. 5). All six adults were more  
364 likely to be associated with EVI values between 0.35-0.55 (Fig. 5), indicating  
365 resource use of moderately dense vegetation averaged over the annual vegetation  
366 growth cycle.

367

368

369

370

371

372

373

374 **Table 2.** Fixed and adaptive kernel density home range estimates (KDE) for six adult Philippine  
 375 Eagles on the island of Mindanao. Estimates calculate 95 % probability of use contour isopleths to  
 376 represent the home range utilization distribution and 50 % probability of use contour isopleths to  
 377 represent a core range utilization distribution, SAMSE = Sum of the Asymptotic Mean Squared Error  
 378 pilot bandwidth selector. All area values in the 95% and 50% columns are km<sup>2</sup>.  
 379

| ID     | Epanechnikov fixed KDE |     |        | SAMSE adaptive plug-in KDE |     |        |
|--------|------------------------|-----|--------|----------------------------|-----|--------|
|        | 95%                    | 50% | % core | 95%                        | 50% | % core |
| 001F   | 58                     | 11  | 19     | 37                         | 7   | 19     |
| 002F   | 64                     | 13  | 20     | 48                         | 9   | 19     |
| 003F   | 43                     | 9   | 21     | 28                         | 7   | 25     |
| 004M   | 87                     | 20  | 23     | 58                         | 13  | 22     |
| 005M   | 36                     | 8   | 22     | 26                         | 5   | 19     |
| 006F   | 126                    | 17  | 13     | 56                         | 6   | 11     |
| Median | 61                     | 12  | 21     | 43                         | 7   | 19     |

380

381

382 **Table 3.** Autocorrelated kernel density estimates (AKDE) for six adult Philippine Eagles on the island  
 383 of Mindanao. Estimates calculate 95 % probability of use contour isopleths to represent the home  
 384 range utilization distribution and 50 % probability of use contour isopleths to represent a core range  
 385 utilization distribution with 95% Confidence Intervals (CI). All area values in the 95% and 50%  
 386 columns are km<sup>2</sup>.

387

| ID     | Autocorrelated KDE |            |        |
|--------|--------------------|------------|--------|
|        | 95% (CI)           | 50% (CI)   | % core |
| 001F   | 64 (59-70)         | 12 (11-13) | 19     |
| 002F   | 71 (64-78)         | 13 (12-14) | 18     |
| 003F   | 39 (33-45)         | 9 (8-11)   | 24     |
| 004M   | 108 (85-133)       | 24 (18-29) | 22     |
| 005M   | 41 (37-46)         | 9 (8-10)   | 22     |
| 006F   | 161 (133-192)      | 33 (28-40) | 21     |
| Median | 68 (62-74)         | 13 (11-14) | 21     |

388

389



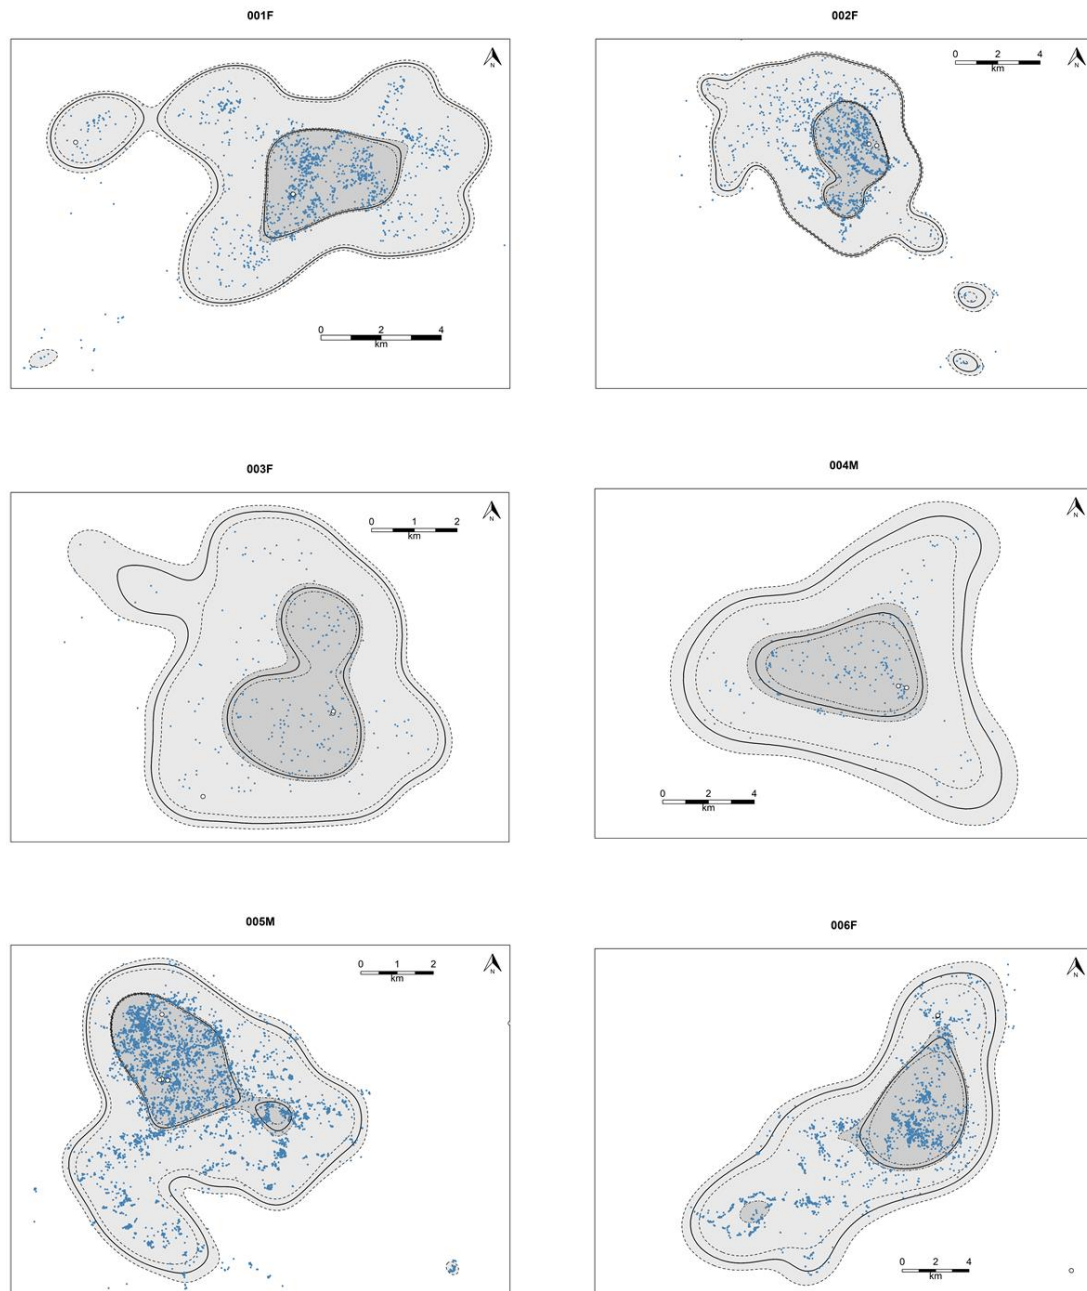

390

391 **Figure 1.** Autocorrelated kernel density estimates (AKDE) for six adult Philippine Eagles on the island

392 of Mindanao. Maximum likelihood estimates (bold black lines) calculate 95 % probability of use (light

393 grey) to represent the home range utilization distribution and 50 % probability of use (dark grey) to

394 represent a core range utilization distribution. Hashed lines show 95% Confidence Intervals for both

395 home and core range maximum likelihood estimates. Blue points show raw locations for each

396 respective adult Philippine Eagle, except for adult 005M which was sub-sampled using a 3-hr interval

397 due to computing constraints. White points indicate nest sites.

398

399 **Table 4.** Local Convex Hull (LoCoH) and time Local Convex Hull (T-LoCoH) home range estimates  
400 for six adult Philippine Eagles on the island of Mindanao. Estimates calculate 95 % probability of use  
401 contour isopleths to represent the home range utilization distribution and 50 % probability of use  
402 contour isopleths to represent a core range utilization distribution. All area values in the 95% and 50%  
403 columns are km<sup>2</sup>.  
404

| ID     | LoCoH |     |        | T-LoCoH |     |        |
|--------|-------|-----|--------|---------|-----|--------|
|        | 95%   | 50% | % core | 95%     | 50% | % core |
| 001F   | 33    | 8   | 24     | 60      | 13  | 22     |
| 002F   | 49    | 10  | 20     | 53      | 14  | 26     |
| 003F   | 22    | 5   | 23     | 24      | 9   | 38     |
| 004M   | 45    | 7   | 16     | 58      | 16  | 28     |
| 005M   | 26    | 5   | 19     | 34      | 8   | 24     |
| 006F   | 74    | 5   | 7      | 109     | 13  | 12     |
| Median | 39    | 6   | 20     | 56      | 13  | 25     |

405  
406  
407  
408  
409  
410  
411  
412  
413  
414  
415  
416  
417  
418  
419

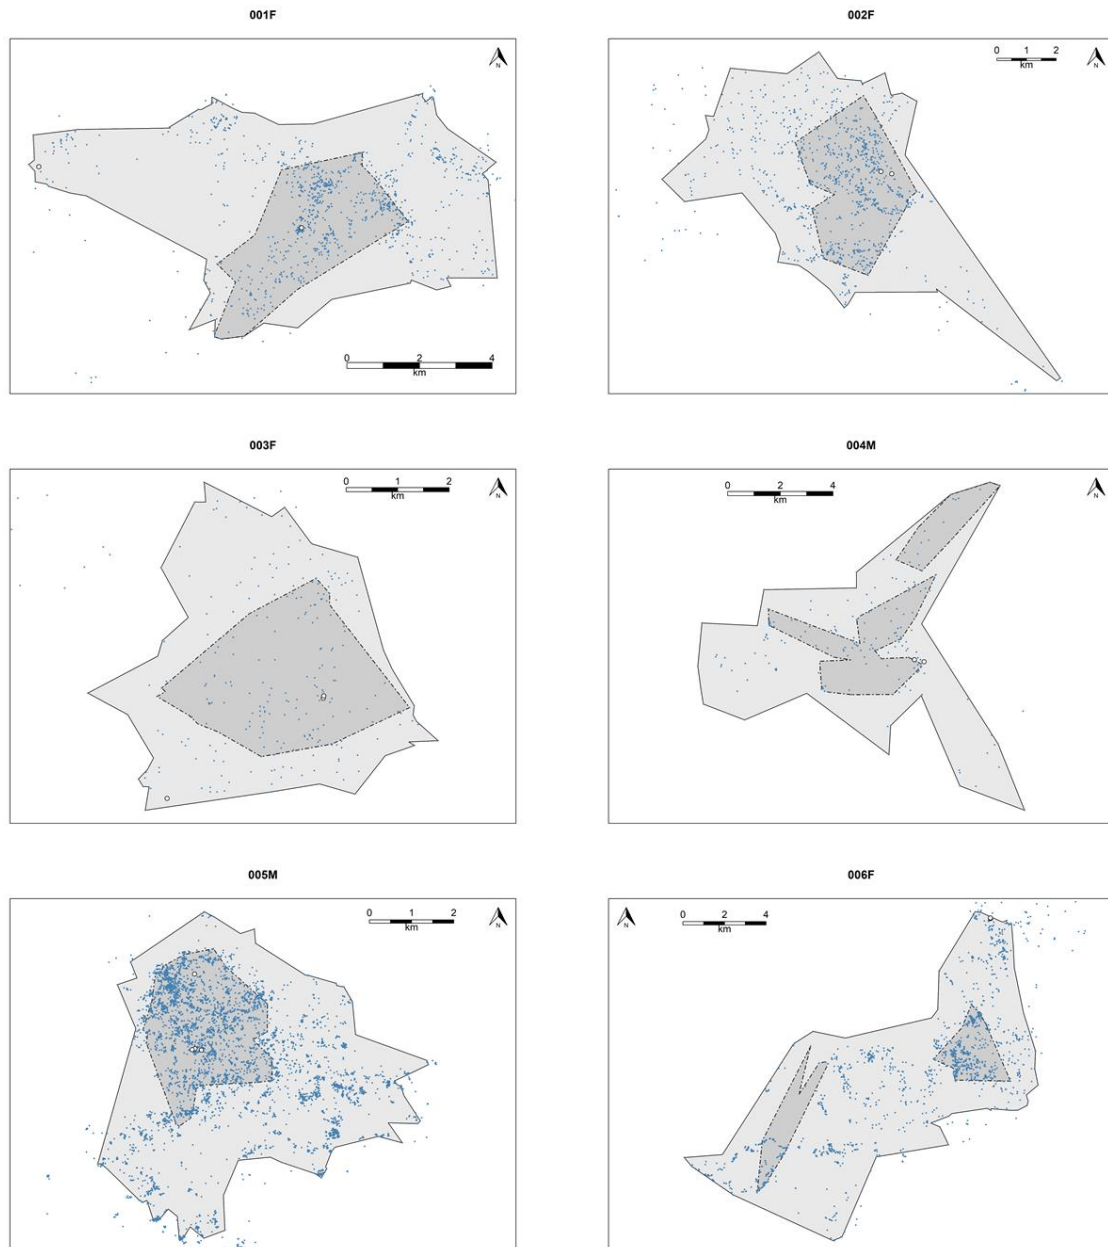

420

421 **Figure 2.** Time Local Convex Hull (T-LoCoH) home range estimates for six adult Philippine Eagles on

422 the island of Mindanao. Estimates calculate 95 % probability of use to represent the home range

423 utilization distribution (light grey) and 50 % probability of use to represent a core range utilization

424 distribution (dark grey). Blue points show filtered locations using a 3-hr sampling interval for each

425 respective adult Philippine Eagle. White points indicate nest sites.

426

427

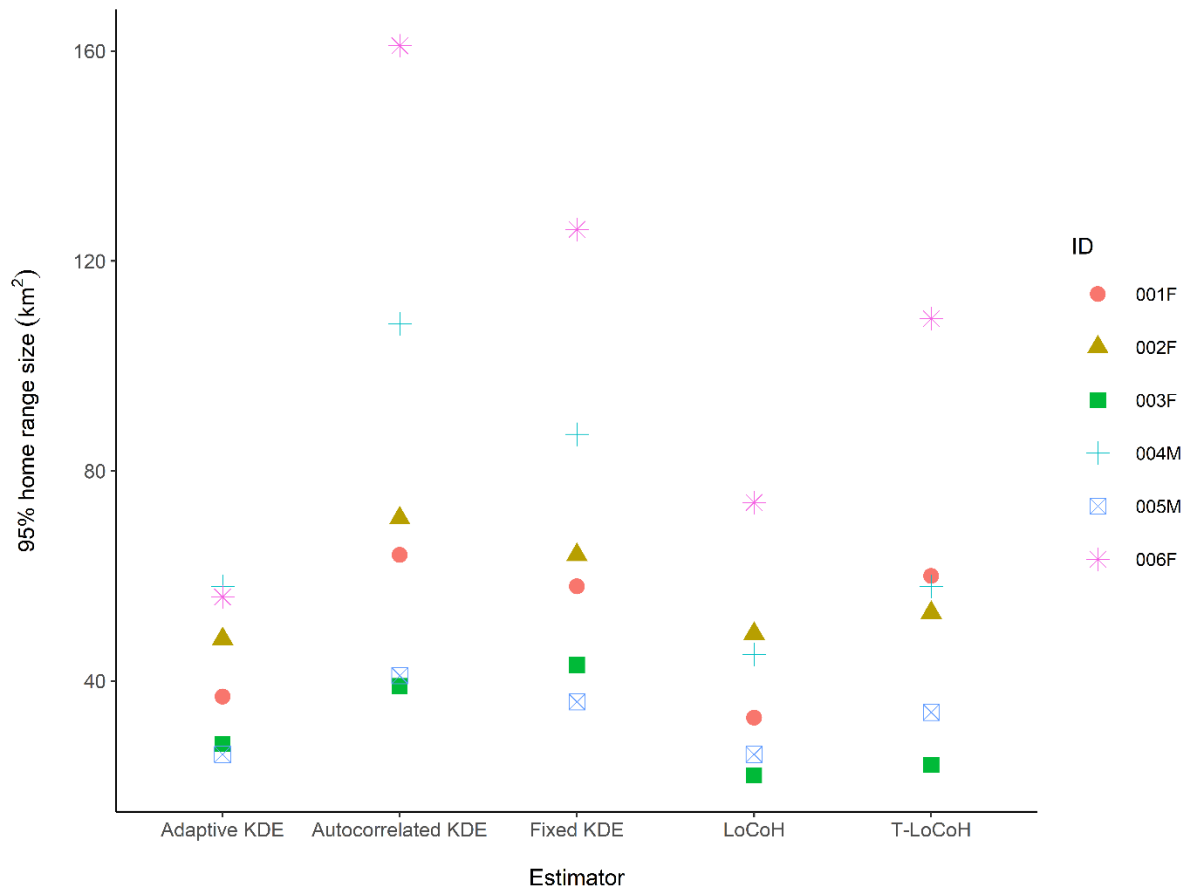

428

429

430 **Figure 3.** Comparison of five home range size estimators from 95 % probability of use to represent

431 the home range utilization distribution for six adult Philippine Eagles on the island of Mindanao. KDE =

432 kernel density estimate, LoCoH = Local Convex Hull, T-LoCoH = Time Local Convex Hull.

433

434

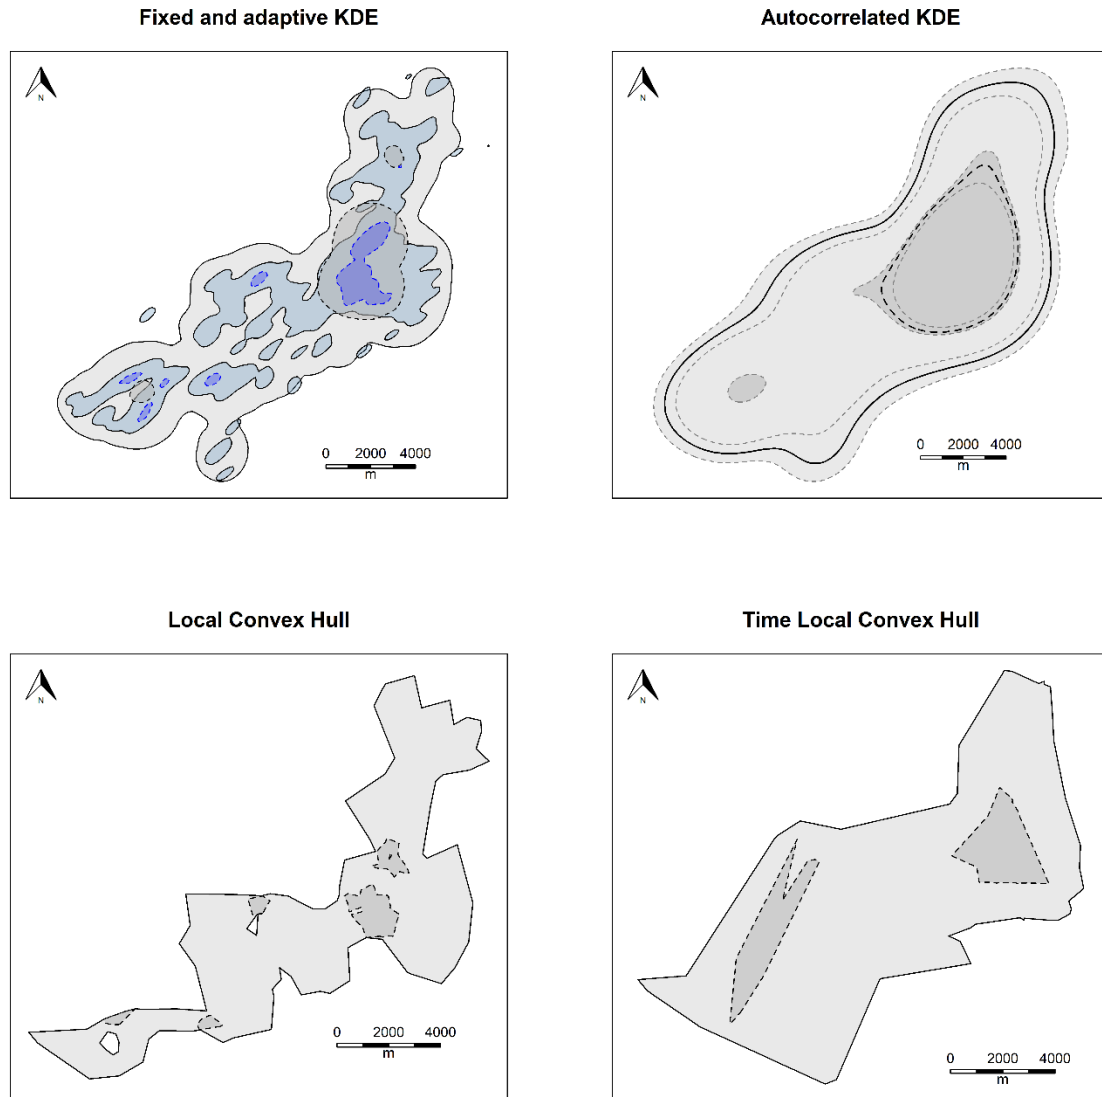

435

436 **Figure 4.** Home range estimates for adult female Philippine Eagle 006F using five home range  
437 estimators (KDE = kernel density estimate). Estimates calculate 95 % probability of use to represent  
438 the home range utilization distribution (light grey with solid black lines) and 50 % probability of use to  
439 represent a core range utilization distribution (dark grey with hashed black lines), except for the  
440 adaptive KDE 95 % home range which is shown in light blue with solid black line and 50 % core range  
441 shown in dark blue with hashed black line. For the autocorrelated KDE 95 % Confidence Intervals are  
442 shown by hashed light grey lines.

443

444

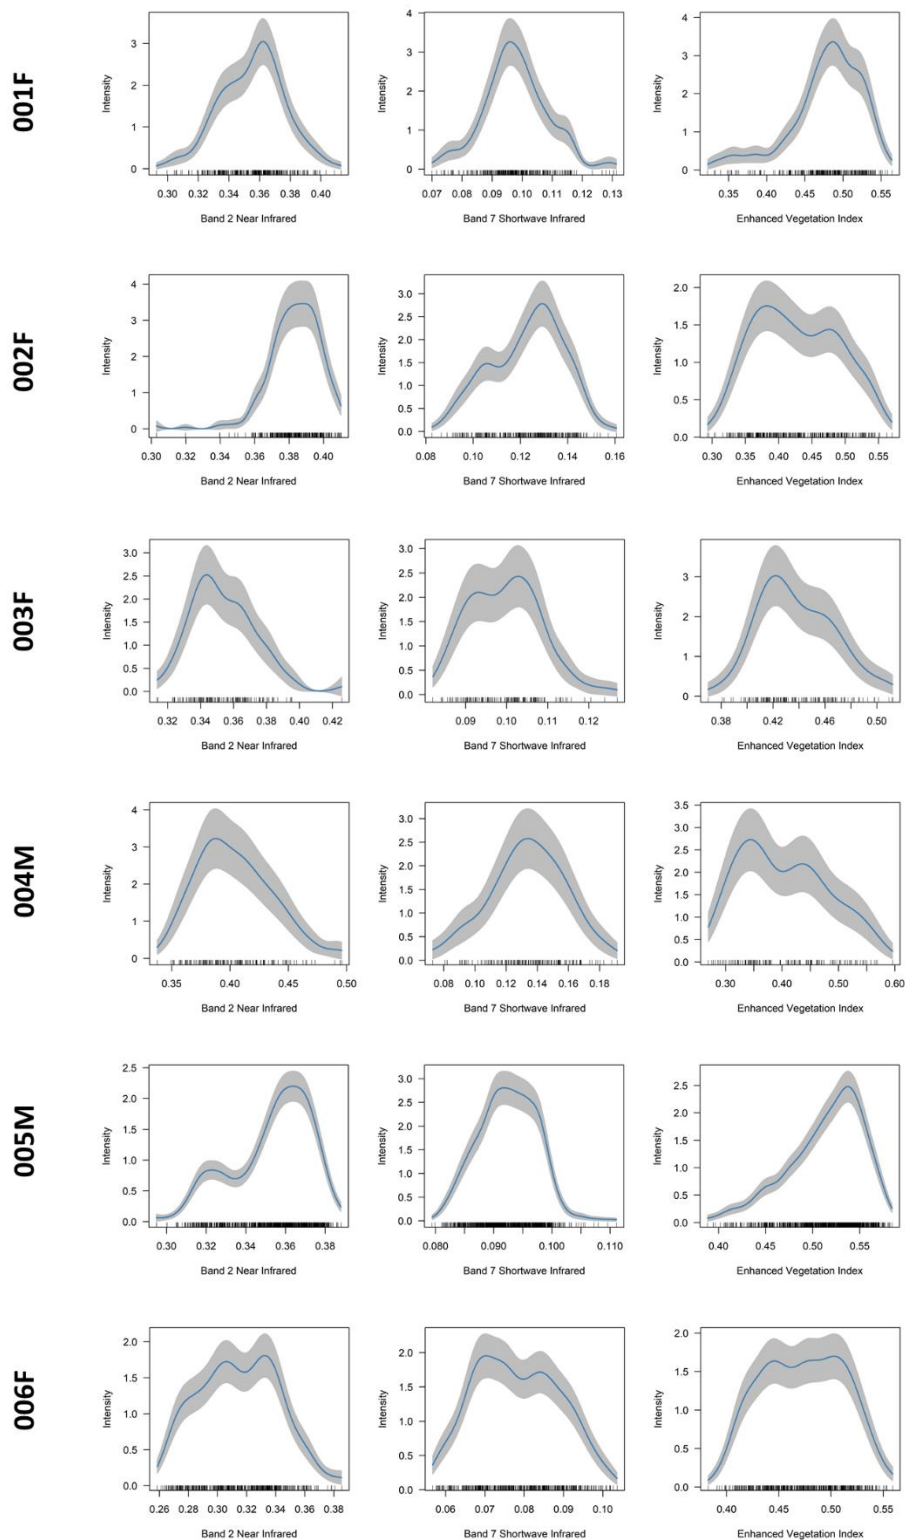

445

446 **Figure 5.** Non-parametric resource selection response curves (blue lines) using point process  
447 intensity probability density functions for six adult Philippine Eagles on the island of Mindanao. Grey  
448 shading represents 95% Confidence Intervals.

449

## 450 **Discussion**

451 Quantifying animal space and habitat use is fundamentally important in  
452 understanding the ecological processes influencing an individual animal's behaviour  
453 and movement (Hooten *et al.* 2017). By using a suite of home range estimators, our  
454 results demonstrate that adult Philippine Eagles on Mindanao have relatively small  
455 home ranges, with 75-80 % of space-time use outside of their core territorial range.  
456 AKDE estimated the largest median 95 % home range size = 68 km<sup>2</sup> and the largest  
457 median 50 % core range = 13 km<sup>2</sup>. LoCoH estimated the smallest median 95 %  
458 home range = 39 km<sup>2</sup> and the smallest 50 % core range = 6 km<sup>2</sup>. Additionally, most  
459 adults used areas high in photosynthetic leaf and canopy structure but tended to  
460 avoid areas of old growth biomass and denser areas of vegetation, possibly due to  
461 extended foraging movements outside of densely forested nesting areas. Our results  
462 quantify for the first time two key ecological processes for this critically endangered  
463 raptor that can be useful in informing conservation management.

464

## 465 **Home Range Estimation**

466 Although the median home range estimates for all adults combined was between 39-  
467 68 km<sup>2</sup> for the 95 % home range and 6-13 km<sup>2</sup> for the 50 % core range, there was  
468 wide variance in home range sizes for each individual eagle irrespective of the  
469 estimator used (see Fig. 3). For example, variance amongst the adaptive 95 %  
470 kernel estimates was lower (range = 28-56 km<sup>2</sup>), compared to the fixed 95 % kernels  
471 (range = 36-126 km<sup>2</sup>), with the 95 % LoCoH hulls having lower variance (range = 22-  
472 74 km<sup>2</sup>), compared to the T-LoCoH hulls (range = 24-109 km<sup>2</sup>). Though we did not  
473 test this directly, we assume that high variance in home range size amongst  
474 individual eagles is driven by varying resource needs for each eagle across



475 fragmented forest on Mindanao. The ratio of percent space use for the 50 % core  
476 range within the 95 % home range was generally consistent across all estimators  
477 between 19-21 %, except for T-LoCoH where this increased to 25 % core range use.  
478 Thus, adult Philippine Eagles are using 75-80 % of space-time use outside of the  
479 core territorial area, presumably when searching for food within their home range.  
480

481 Previous home range estimates for the Philippine Eagle calculated median 95 %  
482 home range sizes between 64-90 km<sup>2</sup> (Sutton *et al.* 2022), similar to our estimates  
483 here. These uniform estimates are not surprising because Sutton *et al.* used the  
484 same satellite telemetry dataset to calculate home range sizes but using a fixed  
485 Gaussian KDE, a radius LoCoH and a minimum convex polygon as estimators. Prior  
486 to these quantitative home range estimates, Rabor (1968) suggested a home range  
487 of 40-50 km<sup>2</sup> for the Philippine Eagle, within the lower range of our median 95 %  
488 estimates, with Gonzales (1968, 1971) suggesting up to 100 km<sup>2</sup>. However,  
489 Kennedy (1977) calculated much lower home range sizes of between 13-25 km<sup>2</sup>  
490 based on polygon and circular estimates from observer sightings of a pair of  
491 breeding eagles within an approximately 5x5 km<sup>2</sup> area. Assuming these sightings  
492 were of a nesting territorial pair then they are remarkably similar to our upper range  
493 of 50 % core territorial range estimates.

494

#### 495 **Resource selection**

496 Habitat resource selection by animals will often give contrasting results related to  
497 issues of scale (Boyce 2006). Our results showed all eagles were associated with  
498 medium Band 2 Near Infrared reflectance values, representing healthy  
499 photosynthetic leaf and canopy structure but low Band 7 Shortwave Infrared values



500 representing old growth forest, in contrast to a previous range-wide habitat use  
501 assessment (Sutton *et al.* 2022). Thus, solely using GPS fixes from the six adults  
502 captured the finer scale home range resource use, which is generally outside of old  
503 growth forest areas. This is possibly related to adults foraging over secondary forest  
504 and cleared agricultural lands along forest edges (Kennedy 1977; Salvador & Ibañez  
505 2006). These foraging areas are distant from nest sites which are generally within  
506 denser forested areas (Salvador & Ibañez 2006; Ibañez *et al.* 2003). This  
507 assumption is further supported by the general association with medium values of  
508 Enhanced Vegetation Index, indicating most adults are using areas of canopy  
509 vegetation density between EVI values of 0.35-0.55 over the annual growth period  
510 (see Fig. 5).

511  
512 Human-eagle conflicts are one of the key threats to the future survival of the  
513 Philippine Eagle (Ibañez *et al.* 2016). Due to the habitat preferences identified here  
514 for forest edges and clearings which are the same areas humans occupy, the  
515 likelihood of human-eagle encounters is high, which often results in death or severe  
516 injury for eagles. This is mainly through retaliatory trapping due to eagle predation on  
517 domestic animals, or accidental trapping in snares set by locals to capture wildlife in  
518 the forests. This is further exacerbated in forest edges because these areas are  
519 often designated as buffers or multiple use zones in protected areas which may not  
520 offer the protection needed for Philippine Eagles. Previously, conservation priorities  
521 for the Philippine Eagle have been focused on protecting nest sites in densely  
522 forested areas (Sutton *et al.* 2022). However, whilst this is still important, we show  
523 that adult eagles spend 75-80 % of space-time outside of core nesting areas in  
524 human fragmented landscapes. Thus, promoting eagle-friendly lifestyles and values

525 within forest communities as part of area-based conservation is also necessary at  
526 nest sites located in forest edges, along with community incentives to reduce human-  
527 eagle conflict (Ibañez *et al.* 2016).

528

529 We recognise there are limitations to our inferences due to the low sample size of  
530 individual eagles tagged. However, the financing of expensive GPS telemetry  
531 devices, along with capturing adult eagles in rugged and remote tropical forest  
532 terrain is difficult. Tagging more adult eagles, including beyond Mindanao, would  
533 allow further interpretation of the results and conclusions here. We also recognise  
534 the large differences in the number of GPS fixes between adults and the subsequent  
535 potential bias in our results. However, all our sample sizes were within the range  
536 deemed suitable for estimating home range size (Bekoff & Mech 1984; Seaman *et*  
537 *al.* 1999) and resource selection (Northrup *et al.* 2013). The disparity between GPS  
538 location sample size is largely due to tagged adults being deliberately killed (Ibañez  
539 *et al.* 2016) or tags failing. There is little we can do about this in the context of the  
540 current study. However, accounting for these disparities in sample size, rates, and  
541 intervals using methods such as AKDE, whilst improving GPS device setting  
542 protocols, can remedy these issues for home range estimation.

543

544 The use of modern satellite tracking devices, combined with environmental data  
545 derived from satellite remote sensing has revolutionized our collective understanding  
546 of animal movement ecology and resource selection (Seidel *et al.* 2018). Building on  
547 the analyses here by incorporating movement models using either Hidden Markov  
548 models (HMMs; Langrock *et al.* 2012) or integrated Step-Selection Functions (iSSFs;  
549 Avgar *et al.* 2016), would further identify the drivers of Philippine Eagle space and

550 resource use from latent behavioural states and movement patterns. Rather than  
551 focusing on a single 'best' home range estimator, we implemented a range of robust  
552 space use estimators, along with easily interpretable resource selection functions to  
553 accommodate variation in space and resource use across individual eagles to help  
554 inform conservation management. We recommend that analysts consider various  
555 statistical approaches to animal movement data to fully explore space-time and  
556 resource use, ensuring that model outputs are interpretable to conservation  
557 managers and practitioners.

558

### 559 **Acknowledgements**

560 We thank all staff and volunteers from the Philippine Eagle Foundation (PEF) who  
561 conducted fieldwork over the past four decades, including local forest guards, nest  
562 wardens and indigenous co-researchers. LJS thanks The Peregrine Fund for  
563 providing a post-doctoral research grant and we thank the M.J. Murdoch Charitable  
564 Trust for funding. The PEF would like to thank local government partners across the  
565 Philippines, and the following institutions that funded and supported the field surveys  
566 and nest monitoring: Mohammed Bin Zayed Conservation Fund, Local Government  
567 of Apayao and Calanasan, Disney Conservation, Whitley Fund for Nature,  
568 Microwave Telemetry Inc, KoEko, Forest Foundation Philippines, The Peregrine  
569 Fund, Direct Aid Program - AusAID, USAID/Phil-Am Fund, USAID/Protect Wildlife,  
570 Insular Life Foundation, GIZ-Coseram, Pacific Paints (Boysen) Philippines, Energy  
571 Development Corporation, UNDP Global Environment Fund, Italy Debt  
572 Swamp/Department of Finance, US Forest Service, San Roque Power Corporation,  
573 Cornell Lab of Ornithology, Raptor Resource Project, and the Department of

574 Environment and Natural Resources through the Biodiversity Management Bureau  
575 and its regional and local offices (DENR Regions 2, 4, 8, 9, 10, 11, 12, and 13).

576

### 577 **Data Accessibility Statement**

578 Upon acceptance the data that support the findings of this study will be made openly  
579 available on the data repository *figshare*

580

### 581 **References**

582 Akaike, H. (1974). A new look at the statistical model identification. *IEEE*

583 *Transactions on Automatic Control*. AC-19: 716–723.

584 Avgar, T., Potts, J.R., Lewis, M.A. & Boyce, M.S. (2016). Integrated step selection  
585 analysis: bridging the gap between resource selection and animal

586 movement. *Methods in Ecology and Evolution*. 7: 619-630.

587 Baddeley, A., Chang, Y.M., Song, Y. & Turner, R. (2012). Nonparametric estimation

588 of the dependence of a spatial point process on spatial covariates. *Statistics*

589 *and its interface*. 5: 221-236.

590 Baddeley, A. & Turner, R. (2005). Spatstat: an R package for analyzing spatial point

591 patterns. *Journal of Statistical Software*. 12: 1-42.

592 Bekoff, M. & Mech, L.D. (1984). Simulation analyses of space use: home range

593 estimates, variability, and sample size. *Behavior Research Methods,*

594 *Instruments, & Computers*. 16: 32-37.

595 Berman, M. (1986). Testing for spatial association between a point process and

596 another stochastic process. *Journal of the Royal Statistical Society: Series C*

597 *(Applied Statistics)*. 35: 54-62.

- 598 Bildstein, K.L., Schelsky, W., Zalles, J. & Ellis, S. (1998). Conservation status of  
599 tropical raptors. *Journal of Raptor Research*. 32: 3-18.
- 600 BirdLife International (2018). *Pithecophaga jefferyi* (amended version of 2017  
601 assessment). The IUCN Red List of Threatened Species 2018:  
602 e.T22696012A129595746. [http://dx.doi.org/10.2305/IUCN.UK.2017-](http://dx.doi.org/10.2305/IUCN.UK.2017-3.RLTS.T22696012A129595746.en)  
603 [3.RLTS.T22696012A129595746.en](http://dx.doi.org/10.2305/IUCN.UK.2017-3.RLTS.T22696012A129595746.en)
- 604 Bivand, R., Pebesma, E. & Gomez-Rubio, V. (2013). *Applied spatial data analysis*  
605 *with R*. 2<sup>nd</sup> Ed. Springer, NY, USA.
- 606 Boyce, M.S. (2006). Scale for resource selection functions. *Diversity and*  
607 *Distributions*. 12: 269-276.
- 608 Burnham, K. & Anderson, D. (2004). *Model selection and multi-model inference*.  
609 Second Edition. Springer-Verlag, NY, USA.
- 610 Burt, W.H. (1943). Territoriality and home range concepts as applied to  
611 mammals. *Journal of Mammalogy*. 24: 346-352.
- 612 Busetto, L. & Raghetti, L. (2016). MODISp: An R package for automatic  
613 preprocessing of MODIS Land Products time series. *Computers &*  
614 *Geosciences*. 97: 40-48.
- 615 Calabrese, J.M., Fleming, C.H. & Gurarie, E. (2016). ctmm: An R package for  
616 analyzing animal relocation data as a continuous-time stochastic  
617 process. *Methods in Ecology and Evolution*. 7: 1124-1132.
- 618 Calenge, C. (2006). The package “adehabitat” for the R software: a tool for the  
619 analysis of space and habitat use by animals. *Ecological Modelling*. 197: 516-519.
- 620 Diggle, P. (1985). A kernel method for smoothing point process data. *Journal of the*  
621 *Royal Statistical Society: Series C (Applied Statistics)*. 34: 138-147.

- 622 Duong, T. (2007). ks: Kernel density estimation and kernel discriminant analysis for  
623 multivariate data in R. *Journal of Statistical Software*. 21: 1-16.
- 624 Duong, T. & Hazelton, M. (2003). Plug-in bandwidth matrices for bivariate kernel  
625 density estimation. *Journal of Nonparametric Statistics*. 15: 17-30.
- 626 Epanechnikov, V.A. (1969). Non-parametric estimation of a multivariate probability  
627 density. *Theory of Probability & Its Applications*. 14: 153-158.
- 628 Fieberg, J. & Börger, L. (2012). Could you please phrase “home range” as a  
629 question? *Journal of Mammalogy*. 93: 890-902.
- 630 Fieberg, J., Signer, J., Smith, B. & Avgar, T. (2021). A ‘How to’ guide for interpreting  
631 parameters in habitat-selection analyses. *Journal of Animal Ecology*. 90: 1027-  
632 1043.
- 633 Fleming, C.H. & Calabrese, J.M. (2017). A new kernel density estimator for accurate  
634 home-range and species-range area estimation. *Methods in Ecology and  
635 Evolution*. 8: 571-579.
- 636 Getz, W.M., Fortmann-Roe, S., Cross, P.C., Lyons, A.J., Ryan, S.J. & Wilmers, C.C.  
637 (2007). LoCoH: nonparameteric kernel methods for constructing home ranges  
638 and utilization distributions. *PloS one*. 2: e207.
- 639 Getz, W M., & Wilmers, C.C. (2004). A local nearest-neighbor convex-hull  
640 construction of home ranges and utilization distributions. *Ecography*. 27: 489-  
641 505.
- 642 Gonzales, R.B. (1968). A study of the breeding biology and ecology of the Monkey-  
643 eating Eagle. *Silliman J*. 15: 461-491.
- 644 Gonzales, R.B. (1971). Report on the 1969 status of the Monkey-eating Eagle on  
645 Mindanao Island, Philippines. *Bull. Int. Count. Bird Preserv*. 11: 154-168.

- 646 Hooten, M.B., Johnson, D.S., McClintock, B.T. & Morales, J.M. (2017). *Animal*  
647 *movement: statistical models for telemetry data*. CRC press. FL, USA.
- 648 Horvitz, D.G. & Thompson, D.J. (1952). A generalization of sampling without  
649 replacement from a finite universe. *Journal of the American Statistical*  
650 *Association*. 47: 663-685.
- 651 Huete, A.R., Artiola, J. & Pepper, I. (2004). Environmental monitoring with remote  
652 sensing. *Environmental Monitoring and Characterization*. pp. 183-206.
- 653 Huete, A., Didan, K., Miura, T., Rodriguez, E.P., Gao, X. & Ferreira, L.G. (2002).  
654 Overview of the radiometric and biophysical performance of the MODIS  
655 vegetation indices. *Remote Sensing of Environment*. 83: 195-213.
- 656 Hurvich, C.M. & Tsai C.L. (1989). Regression and time-series model selection in  
657 small sample sizes. *Biometrika*. 76: 297–307.
- 658 Ibañez, J.C., Miranda, H., Balaquit-Ibañez, G., Afan, D. & Kennedy, R. (2003). Notes  
659 on the breeding behavior of a Philippine Eagle pair in Mount Sinaka, Central  
660 Mindanao. *Wilson Bulletin*. 115: 333-336.
- 661 Ibañez, J.C., Sumaya, A. M., Tampos, G., & Salvador, D. (2016). Preventing  
662 Philippine Eagle hunting: what are we missing? *Journal of Threatened Taxa*. 8:  
663 9505-9511.
- 664 Johnson, D.H. (1980). The comparison of usage and availability measurements for  
665 evaluating resource preference. *Ecology*. 61: 65-71.
- 666 Johnson, C.J., Nielsen, S.E., Merrill, E.H., McDonald, T.L. & Boyce, M.S. (2006).  
667 Resource selection functions based on use-availability data: theoretical  
668 motivation and evaluation methods. *The Journal of Wildlife Management*. 70:  
669 347-357.



- 670 Keating, K.A. & Cherry, S. (2004). Use and interpretation of logistic regression in  
671 habitat-selection studies. *The Journal of Wildlife Management*. 68: 774-789.
- 672 Keating, K.A. & Cherry, S. (2009). Modeling utilization distributions in space and  
673 time. *Ecology*. 90: 1971-1980.
- 674 Kennedy, R.S. (1977). Notes on the biology and population status of the monkey-  
675 eating eagle of the Philippines. *The Wilson Bulletin*. 89: 1-20.
- 676 Kranstauber, B., Smolla, M. & Scharf, A.K. (2020). move: Visualizing and Analyzing  
677 Animal Track Data. R package version 3.3.0. [https://CRAN.R-](https://CRAN.R-project.org/package=move)  
678 [project.org/package=move](https://CRAN.R-project.org/package=move)
- 679 Langrock, R., King, R., Matthiopoulos, J., Thomas, L., Fortin, D. & Morales, J.M.  
680 (2012). Flexible and practical modeling of animal telemetry data: hidden Markov  
681 models and extensions. *Ecology*. 93: 2336-2342.
- 682 Leutner, B., Horning, N. & Schwalb-Willmann, J. (2019). Package RStoolbox: Tools  
683 for Remote Sensing Data Analysis. R package version 0.2.6. [https://CRAN.R-](https://CRAN.R-project.org/package=RStoolbox)  
684 [project.org/package=RStoolbox](https://CRAN.R-project.org/package=RStoolbox)
- 685 Laver, P N. & Kelly, M.J. (2008). A critical review of home range studies. *The Journal*  
686 *of Wildlife Management*. 72: 290-298.
- 687 Lyons, A.J., Turner, W.C. & Getz, W.M. (2013). Home range plus: a space-time  
688 characterization of movement over real landscapes. *Movement Ecology*. 1: 1-  
689 14.
- 690 Manly, B F.L., McDonald, L., Thomas, D.L., McDonald, T.L. & Erickson, W.P. (2002).  
691 *Resource selection by animals: statistical design and analysis for field studies*.  
692 2<sup>nd</sup> edition. Kluwer Academic Publishers.
- 693 McClure, C.J.W., Anderson, D.L., Buij, R., Dunn, L., Henderson, M.T., McCabe, J.,  
694 ... & Tavares, J. (2021). Commentary: The past, present, and future of the



- 695 Global Raptor Impact Network. *Journal of Raptor Research*. DOI: 10.3356/JRR-  
696 21-13.
- 697 Miranda, H.C. & Ibañez, J.C. 2006. A modified Bal-Chatri to capture Great Philippine  
698 eagles for radio-telemetry. *Journal of Raptor Research*. 40:235-237.
- 699 Morán-Ordóñez, A., Suárez-Seoane, S., Elith, J., Calvo, L. & de Luis, E. (2012).  
700 Satellite surface reflectance improves habitat distribution mapping: a case  
701 study on heath and shrub formations in the Cantabrian Mountains (NW  
702 Spain). *Diversity and Distributions*. 18: 588-602.
- 703 Northrup, J.M., Hooten, M B., Anderson Jr, C.R. & Wittemyer, G. (2013). Practical  
704 guidance on characterizing availability in resource selection functions under a  
705 use–availability design. *Ecology*. 94: 1456-1463.
- 706 R Core Team. (2018). R: A language and environment for statistical computing. R  
707 Foundation for Statistical Computing, Vienna, Austria. [https://www.R-](https://www.R-project.org/)  
708 [project.org/](https://www.R-project.org/).
- 709 Rabor, D.S. (1968). The present status of the Monkey-eating Eagle, *Pithecophaga*  
710 *jefferyi* Ogilvie-Grant, of the Philippines. *Int. Union Conserv. Nat. Nat. Resour.*  
711 *Publ. New Ser. No. 10*: 312-314.
- 712 Ripley, B.D. (1988). *Statistical inference for spatial processes*. Cambridge University  
713 Press, UK.
- 714 Qiu, J., Yang, J., Wang, Y. & Su, H. (2018). A comparison of NDVI and EVI in the  
715 DisTrad model for thermal sub-pixel mapping in densely vegetated areas: A  
716 case study in Southern China. *International Journal of Remote Sensing*. 39:  
717 2105-2118.
- 718 Salvador, D.J. & Ibanez, J.C. (2006). Ecology and conservation of Philippine  
719 Eagles. *Ornithological Science*. 5: 171-176.

- 720 Seaman, D.E., Millspaugh, J.J., Kernohan, B.J., Brundige, G.C., Raedeke, K.J. &  
721 Gitzen, R.A. (1999). Effects of sample size on kernel home range  
722 estimates. *The Journal of Wildlife Management*. 63: 739-747.
- 723 Shirley, S.M., Yang, Z., Hutchinson, R.A., Alexander, J.D., McGarigal, K. & Betts, M.  
724 G. (2013). Species distribution modelling for the people: unclassified landsat  
725 TM imagery predicts bird occurrence at fine resolutions. *Diversity and*  
726 *Distributions*. 19: 855-866.
- 727 Signer, J., Balkenhol, N., Ditmer, M. & Fieberg, J. (2015). Does estimator choice  
728 influence our ability to detect changes in home-range size? *Animal*  
729 *Biotelemetry*. 3: 1-9.
- 730 Signer, J. & Fieberg, J.R. (2021). A fresh look at an old concept: Home-range  
731 estimation in a tidy world. *PeerJ*. 9: e11031.
- 732 Seidel, D.P., Dougherty, E., Carlson, C. & Getz, W.M. (2018). Ecological metrics and  
733 methods for GPS movement data. *International Journal of Geographical*  
734 *Information Science*. 32: 2272-2293.
- 735 Silva, I., Fleming, C.H., Noonan, M.J., Alston, J., Folta, C., Fagan, W.F. & Calabrese,  
736 J.M. (2021). Autocorrelation-informed home range estimation: a review and  
737 practical guide. *Methods in Ecology and Evolution*. DOI: 10.1111/2041-  
738 210X.13786.
- 739 Silverman, B.W. (1986). *Density estimation for statistics and data analysis*. Chapman  
740 & Hall.
- 741 Sutton, L J., Ibañez, J.C., Salvador, D.I., Taraya, R.L., Opiso, G.S., Senarillos, T.P.,  
742 & McClure, C.J.W. (2022). Priority conservation areas and a global population  
743 estimate for the Critically Endangered Philippine Eagle derived from modelled

- 744 range metrics using remote sensing habitat characteristics. *bioRxiv*.
- 745 DOI: <https://doi.org/10.1101/2021.11.29.470363>
- 746 Tétreault, M., & Franke, A. (2017). Home range estimation: examples of estimator  
747 effects. *Applied Raptor Ecology: essentials from Gyrfalcon research*. pp 207-  
748 242. The Peregrine Fund, Boise, Idaho, USA.
- 749 Uhlenbeck, G.E. & Ornstein, L.S. (1930). On the theory of the Brownian  
750 motion. *Physical Review*. 36: 823-841.
- 751 Vander Wal, E. & Rodgers, A.R. (2012). An individual-based quantitative approach  
752 for delineating core areas of animal space use. *Ecological Modelling*. 224: 48-  
753 53.
- 754 Van doninck, J., Jones, M.M., Zuquim, G., Ruokolainen, K., Moulatlet, G.M., Siren,  
755 A., Cardenas, G., Lehtonen, S. & Tuomisto, H. (2020). Multispectral canopy  
756 reflectance improves spatial distribution models of Amazonian understory  
757 species. *Ecography*. 43: 128-137.
- 758 Van Winkle, W. (1975). Comparison of several probabilistic home-range models. *The*  
759 *Journal of Wildlife Management*. 39: 118-123.
- 760 Wand, M.P. & Jones, M.C. (1994). Multivariate plug-in bandwidth  
761 selection. *Computational Statistics*. 9: 97-116.
- 762 White, G.C. & Garrott, R.A. (1990). Analysis of Wildlife Radio-tracking Data.  
763 Academic Press, San Diego, CA, USA.
- 764 Worton, B.J. (1987). A review of models of home range for animal  
765 movement. *Ecological Modelling*. 38: 277-298.
- 766 Worton, B.J. (1989). Kernel methods for estimating the utilization distribution in  
767 home-range studies. *Ecology*. 70: 164-168.
- 768

769 **Supplementary Tables**

770 **Table S1.** Comparison of candidate movement models for each adult Philippine Eagle from Ornstein-  
 771 Uhlenbeck (OU) movement patterns including both isotropic and anisotropic variants using change in  
 772 Akaike's Information Criterion corrected for small sample sizes ( $\Delta AICc$ ). OUF = Ornstein-Uhlenbeck  
 773 foraging process , IID = Independent and identically distributed data,  $\Delta RMSPE$  = root mean square  
 774 predictive error, DOF = effective number of degrees of freedom.

| ID   | Movement process | $\Delta AICc$ | $\Delta RMSPE$ (km) | DOF     |
|------|------------------|---------------|---------------------|---------|
| 001F | OU anisotropic   | 0.00          | 0.00                | 407.58  |
|      | OUF anisotropic  | 2.01          | -3.58               | 408.61  |
|      | OU isotropic     | 244.67        | 79.27               | 385.83  |
|      | OUF isotropic    | 246.67        | 75.22               | 386.90  |
|      | IID anisotropic  | 2238.31       | -164.98             | 1487.00 |
| 002F | OU anisotropic   | 0.00          | 0.00                | 283.00  |
|      | OUF anisotropic  | 2.01          | -5.10               | 284.11  |
|      | OU isotropic     | 88.42         | 94.78               | 263.74  |
|      | OUF isotropic    | 90.42         | 91.20               | 264.43  |
|      | IID anisotropic  | 2734.57       | -183.76             | 1370.00 |
| 003F | OU anisotropic   | 0.00          | 0.00                | 105.95  |
|      | OUF anisotropic  | 0.53          | 2.63                | 114.50  |
|      | OU isotropic     | 3.49          | -16.74              | 109.38  |
|      | OUF isotropic    | 4.45          | -15.60              | 116.79  |
|      | IID anisotropic  | 109.75        | -28.85              | 263.00  |
| 004M | OU anisotropic   | 0.00          | 0.00                | 51.41   |
|      | OUF anisotropic  | 2.06          | -39.40              | 52.52   |
|      | OU isotropic     | 21.52         | -182.89             | 56.90   |
|      | OUF isotropic    | 23.55         | -213.36             | 57.92   |
|      | IID anisotropic  | 464.52        | -439.68             | 240.00  |
| 005M | OU anisotropic   | 0.00          | 0.00                | 146.62  |
|      | OUF anisotropic  | 1.46          | -40.04              | 148.61  |
|      | OU isotropic     | 367.55        | -802.23             | 147.62  |
|      | OUF isotropic    | 366.94        | -851.92             | 152.08  |
|      | IID anisotropic  | 23879.18      | -2579.50            | 5274.00 |
| 006F | OU anisotropic   | 0.00          | 0.00                | 59.86   |
|      | OUF anisotropic  | 1.98          | -41.83              | 60.86   |
|      | OU isotropic     | 160.71        | 380.38              | 51.87   |
|      | OUF isotropic    | 162.68        | 329.77              | 52.83   |
|      | IID anisotropic  | 14844.51      | -54.53              | 2952.00 |

775

## 776 Supplementary Figures

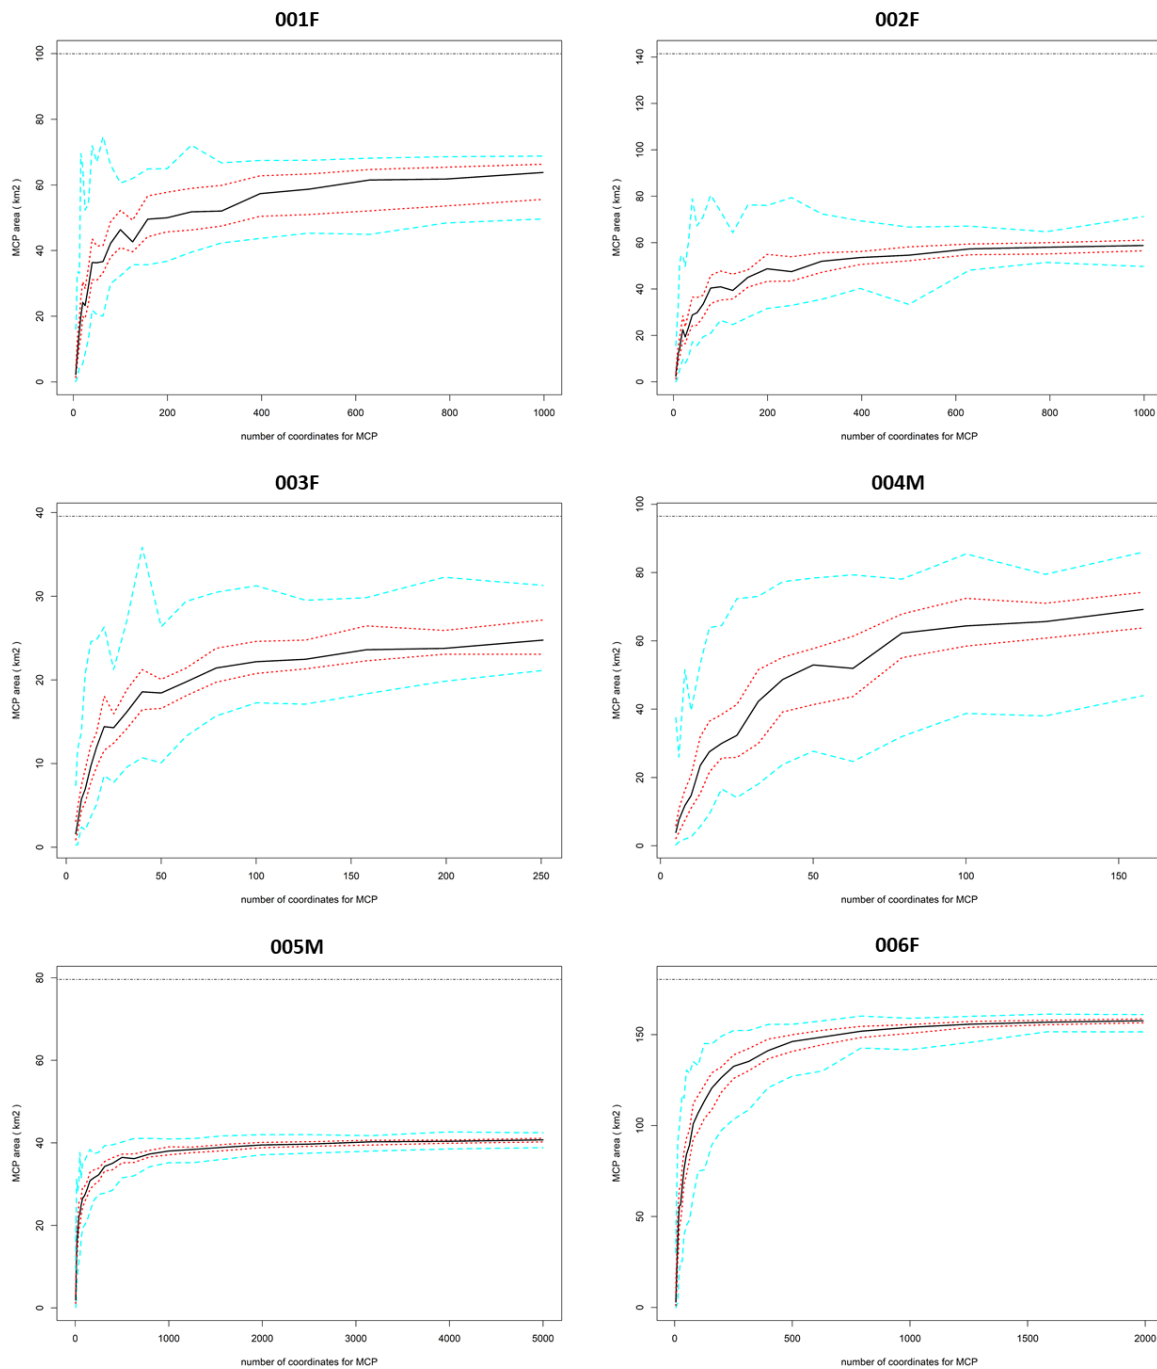

777

778 **Figure S1.** Incremental analysis using bootstrapped minimum convex polygons ( $n = 100$ ), quantifying  
779 when the number of GPS relocations within the MCP area reached an asymptote for capturing the  
780 utilization distribution for six adult Philippine Eagles on the island of Mindanao. Black line indicates 50  
781 % percentile of MCP area, dashed red lines lower 25% percentile and upper 75 % percentile of MCP  
782 area and dashed turquoise lines indicate 0% and 100% percentile of MCP area.

783

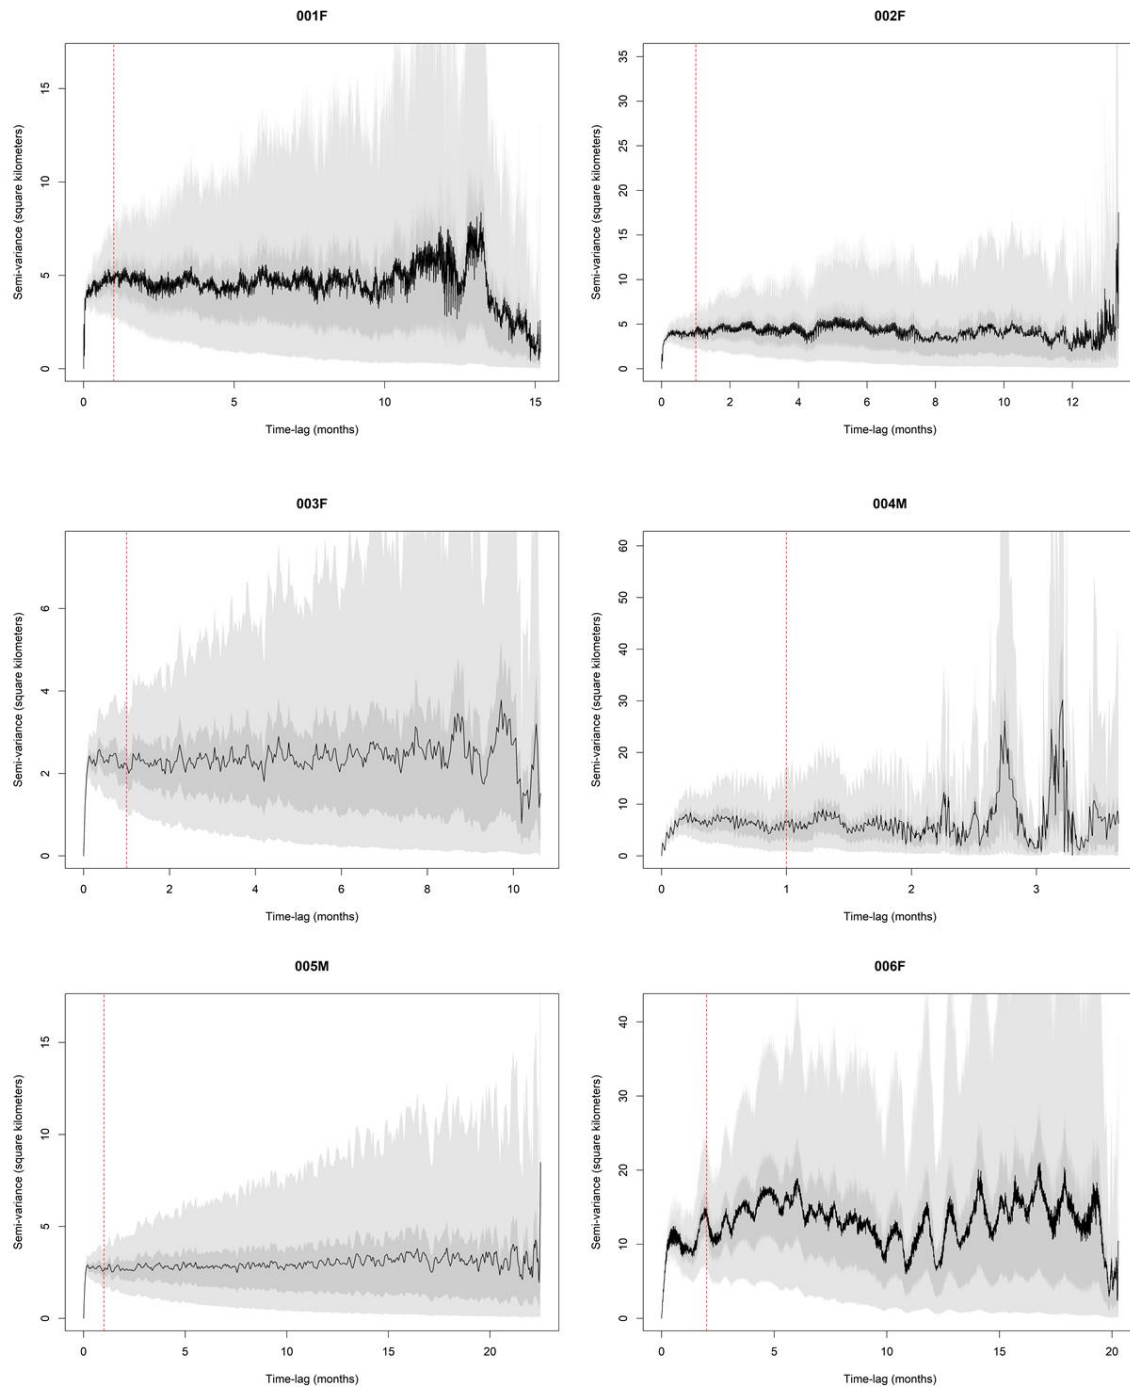

784

785 **Figure S2.** Range residency tests calculated over the entire sampling period for six adult Philippine  
786 Eagles on the island of Mindanao using semi-variance functions visualised with empirical variograms  
787 to identify unbiased estimates of stationary movement periods of site fidelity. Red vertical line  
788 indicates range residency asymptote with Markovian Confidence Intervals for calculating the  
789 maximum number of non-overlapping lags.

790

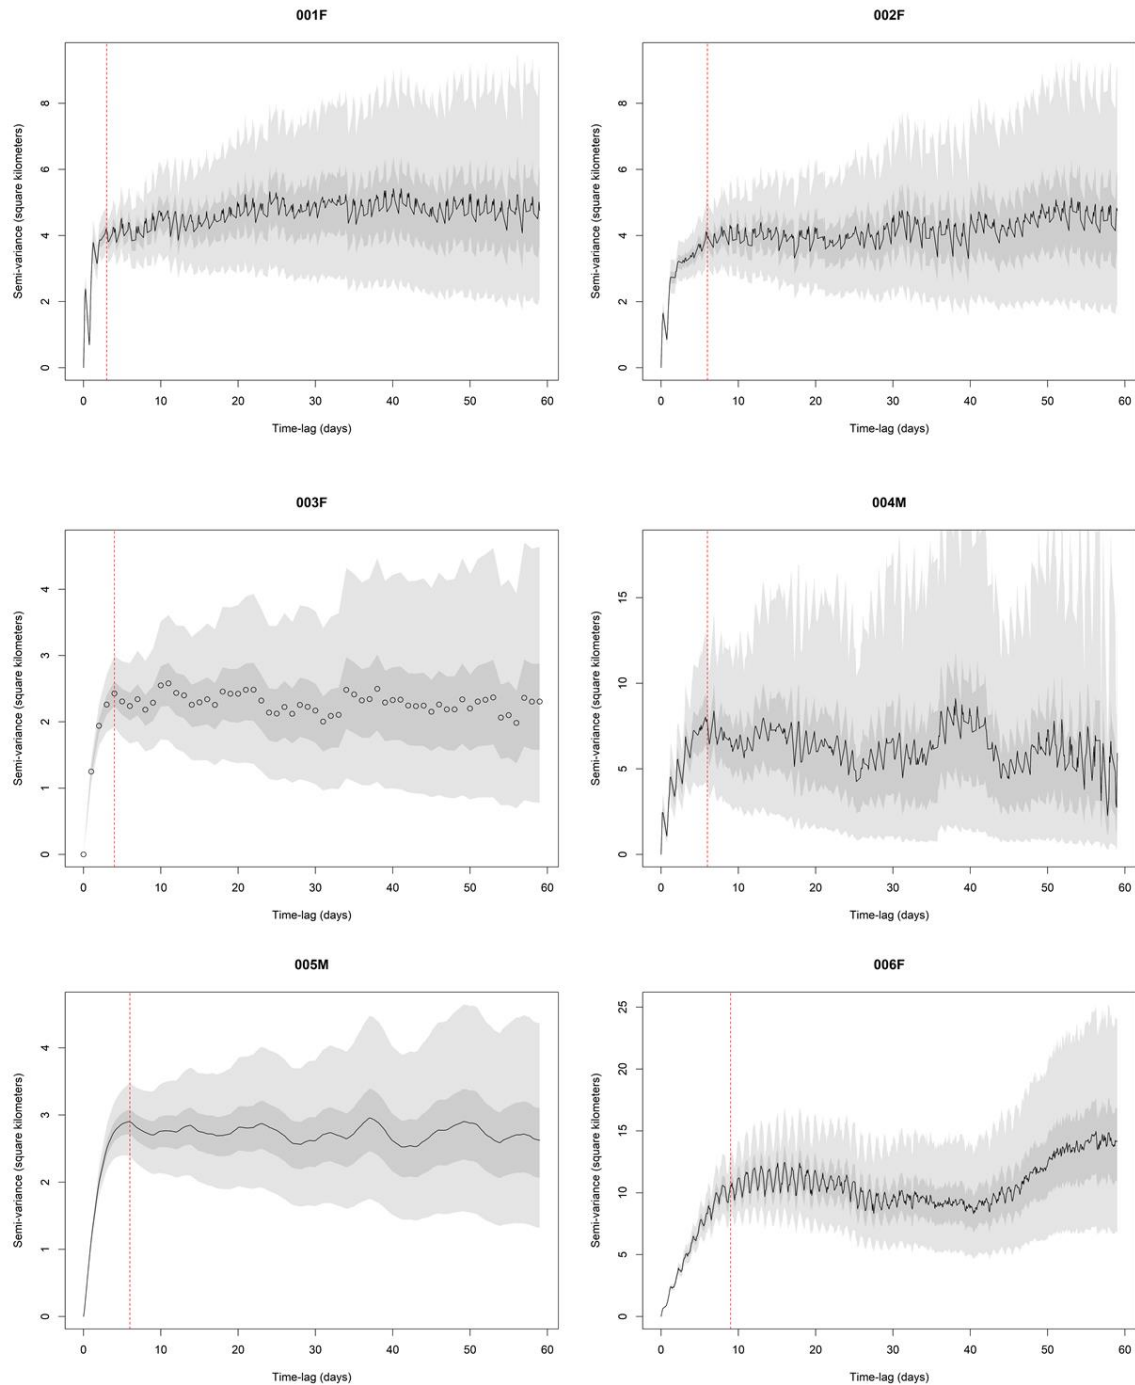

791

792 **Figure S3.** Range residency tests calculated over a 60-day sampling period for six adult Philippine  
793 Eagles on the island of Mindanao using semi-variance functions visualised with empirical variograms  
794 to identify unbiased estimates of stationary movement periods of site fidelity. Red vertical line  
795 indicates range residency asymptote with Markovian Confidence Intervals for calculating the  
796 maximum number of non-overlapping lags.



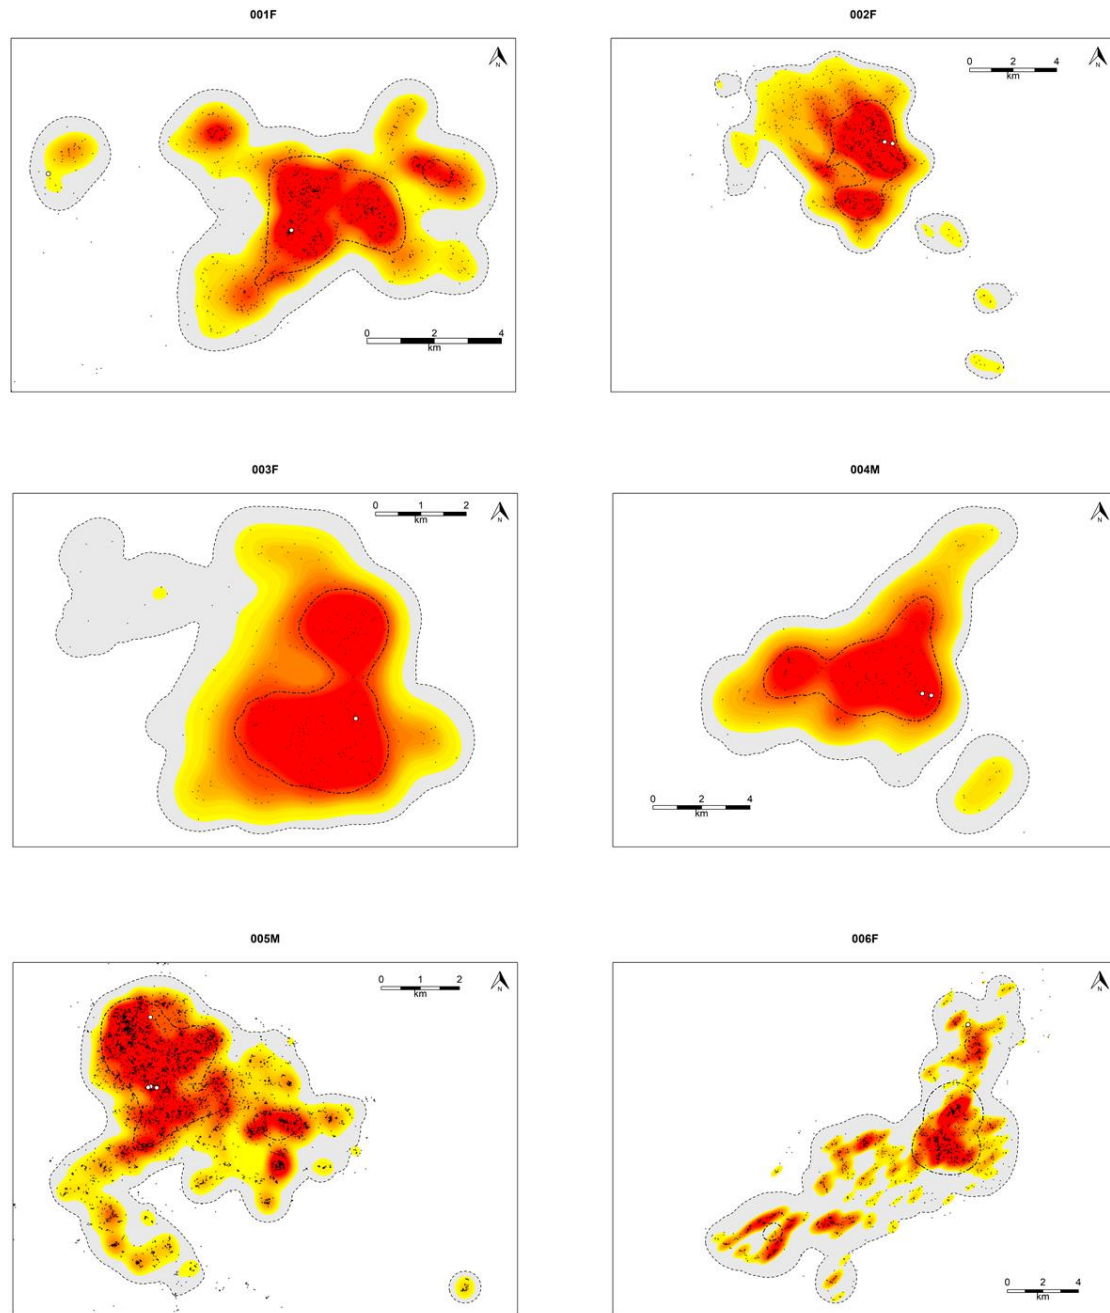

797

798 **Figure S4.** Fixed and adaptive kernel density estimates for six adult Philippine Eagles on the island of  
799 Mindanao. Fixed kernel estimates calculate 95 % probability of use (grey with hashed border) to  
800 represent the home range utilization distribution and 50 % probability of use (black dot-dash line) to  
801 represent a core range utilization distribution. Adaptive kernel estimates calculate 95 % probability of  
802 use contour isopleths (red) to represent the home range utilization distribution and 50 % probability of  
803 use contour isopleths (yellow) to represent a core range utilization distribution. Black points show  
804 filtered locations using a 3-hr sampling interval for each respective adult Philippine Eagle. White  
805 points indicate nest sites.



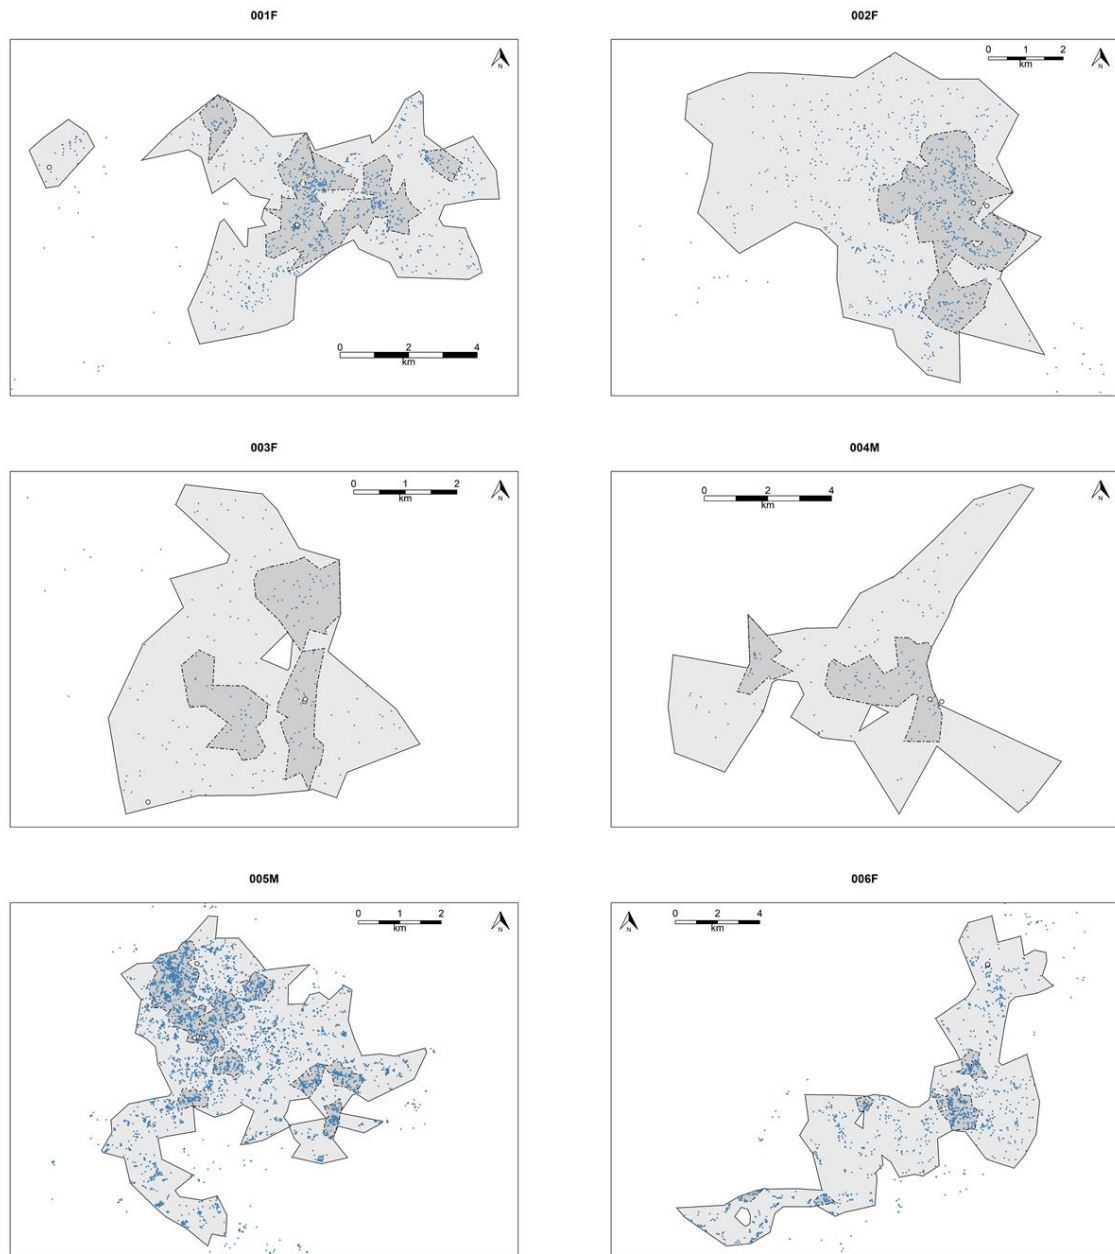

806

807 **Figure S5.** Local Convex Hull (LoCoH) home range estimates for six adult Philippine Eagles on the

808 island of Mindanao. Estimates calculate 95 % probability of use to represent the home range

809 utilization distribution (light grey) and 50 % probability of use to represent a core range utilization

810 distribution (dark grey). Blue points show filtered locations using a 3-hr sampling interval for each

811 respective adult Philippine Eagle. White points indicate nest sites.

812

813
